# Supplementary material
Source: HighWire-hosted journal article supplement (http://www.qdcxjkg.com/highwire/filestream/127259/field_highwire_adjunct_files/2/ERJ-01464-2015_Supplement.pdf)
Supplement: ERJ-01464-2015_Supplement.pdf [file ERJ-01464-2015_Supplement.pdf]

1 **ONLINE SUPPLEMENT**

2

3 Sensitivity of C-Tb – a Novel RD-1-Specific Skin Test for the Diagnosis of TB Infection

4 Authors

5 Soren T. Hoff<sup>2</sup>, Jonathan G. Peter<sup>1</sup>, Grant Theron<sup>1</sup>, Mellissa Pascoe<sup>1</sup>, Pernille N. Tingskov<sup>3</sup>,  
6 Henrik Aggerbeck<sup>3</sup>, Daniel Kolbus<sup>3</sup>, Morten Ruhwald<sup>2</sup>, Peter Andersen<sup>2\*</sup> Keertan Dheda<sup>1\*</sup>

7

8 Author affiliations

9 <sup>1</sup>Lung Infection and Immunity Unit, Division of Pulmonology & UCT Lung Institute, Department  
10 of Medicine, University of Cape Town, Cape Town, South Africa.

11 <sup>2</sup> Statens Serum Institut, Department of Infectious Diseases immunology, Copenhagen,  
12 Denmark

13 <sup>3</sup>Statens Serum Institut, Department of Vaccine Development, Copenhagen, Denmark

14

15 \*Corresponding authors. For questions regarding this trial specifically, please contact Professor  
16 Keertan Dheda. For questions regarding C-Tb in general, please contact Professor Peter  
17 Andersen.

18 Professor Keertan Dheda, H47 Old Main Building, Groote Schuur Hospital, Observatory, 7925,  
19 South Africa. Phone: +27214046509; Fax: +27214047651; E-mail: [keertan.dheda@uct.ac.za](mailto:keertan.dheda@uct.ac.za).

20 Professor Peter Andersen, Statens Serum Institut, Artillerivej 5, 2300 Copenhagen S, Denmark.

21 Phone: +45 3268 3462, E-mail: [PA@ssi.dk](mailto:PA@ssi.dk)

| All, N=241 |           |        |            | HIV-uninfected, N=146 |           |        |           | HIV-infected, N=95 |            |        |           |
|------------|-----------|--------|------------|-----------------------|-----------|--------|-----------|--------------------|------------|--------|-----------|
| C-Tb<br>*  | TST<br>** | QFT-GI | N (%)      | C-Tb<br>*             | TST<br>** | QFT-GI | N (%)     | C-Tb<br>*          | TST<br>*** | QFT-GI | N (%)     |
| +          | +         | +      | 144 (59.8) | +                     | +         | +      | 87 (59.6) | +                  | +          | +      | 57 (60.0) |
| +          | +         | -      | 16 (6.6)   | +                     | +         | -      | 12 (8.2)  | +                  | +          | -      | 4 (4.2)   |
| +          | +         | ind    | 13 (5.4)   | +                     | +         | ind    | 9 (6.2)   | +                  | +          | ind    | 4 (4.2)   |
| +          | -         | +      | 5 (2.1)    | +                     | -         | +      | 4 (2.7)   | +                  | -          | +      | 1 (1.1)   |
| +          | -         | -      | 0 (0.0)    | +                     | -         | -      | 0 (0.0)   | +                  | -          | -      | 0 (0.0)   |
| +          | -         | ind    | 0 (0.0)    | +                     | -         | ind    | 0 (0.0)   | +                  | -          | ind    | 0 (0.0)   |
| -          | +         | +      | 19 (7.9)   | -                     | +         | +      | 14 (9.6)  | -                  | +          | +      | 5 (5.3)   |
| -          | +         | -      | 16 (6.6)   | -                     | +         | -      | 8 (5.5)   | -                  | +          | -      | 8 (8.4)   |
| -          | +         | ind    | 4 (1.7)    | -                     | +         | ind    | 3 (2.1)   | -                  | +          | ind    | 1 (1.1)   |
| -          | -         | +      | 13 (5.4)   | -                     | -         | +      | 7 (4.8)   | -                  | -          | +      | 6 (6.3)   |
| -          | -         | -      | 9 (3.7)    | -                     | -         | -      | 1 (0.7)   | -                  | -          | -      | 8 (8.4)   |
| -          | -         | ind    | 2 (0.8)    | -                     | -         | ind    | 1 (0.7)   | -                  | -          | ind    | 1 (1.1)   |

\*C-Tb cut-point  $\geq 5$  mm in all participants, \*\* TST cut-point  $\geq 15$  mm in HIV-uninfected participants,  
\*\*\* TST cut-point  $\geq 5$  mm in HIV-infected participants.  
ind: indeterminate QFT-GIT result

23 **TABLE S5 (online supplement).** Number of patients that were positive by C-Tb and/or TST

24 and/or QFT-GIT.

| All, N=241                                   |        |        | HIV-uninfected, N=146                        |          |        | HIV-infected, N=95                          |        |          |    |    |    |
|----------------------------------------------|--------|--------|----------------------------------------------|----------|--------|---------------------------------------------|--------|----------|----|----|----|
|                                              | TST pc | TST ne |                                              | TST pc   | TST ne |                                             | TST pc | TST ne   |    |    |    |
| C-Tb pos                                     | 173    | 5      | 178                                          | C-Tb pos | 108    | 4                                           | 112    | C-Tb pos | 65 | 1  | 66 |
| C-Tb neg                                     | 39     | 24     | 63                                           | C-Tb neg | 25     | 9                                           | 34     | C-Tb neg | 14 | 15 | 29 |
|                                              | 212    | 29     | 241                                          |          | 133    | 13                                          | 146    |          | 79 | 16 | 95 |
| McNemar's test: p< 0.0001<br>Agreement: 0.82 |        |        | McNemar's test: p= 0.0002<br>Agreement: 0.80 |          |        | McNemar's test: p= 0.002<br>Agreement: 0.84 |        |          |    |    |    |

25 **TABLE S6A (Online supplement).** C-Tb versus TST (TST cut-points: HIV-  $\geq 15$  mm, HIV+ 5 mm)

26

27

| All, N=241                                   |        |        | HIV-uninfected, N=146                        |          |        | HIV-infected, N=95                          |        |          |    |    |    |
|----------------------------------------------|--------|--------|----------------------------------------------|----------|--------|---------------------------------------------|--------|----------|----|----|----|
|                                              | TST pc | TST ne |                                              | TST pc   | TST ne |                                             | TST pc | TST ne   |    |    |    |
| C-Tb pos                                     | 174    | 4      | 178                                          | C-Tb pos | 110    | 2                                           | 112    | C-Tb pos | 64 | 2  | 66 |
| C-Tb neg                                     | 41     | 22     | 63                                           | C-Tb neg | 27     | 7                                           | 34     | C-Tb neg | 14 | 15 | 29 |
|                                              | 215    | 26     | 241                                          |          | 137    | 9                                           | 146    |          | 78 | 17 | 95 |
| McNemar's test: p< 0.0001<br>Agreement: 0.81 |        |        | McNemar's test: p< 0.0001<br>Agreement: 0.80 |          |        | McNemar's test: p= 0.006<br>Agreement: 0.83 |        |          |    |    |    |

28 **TABLE S6B (Online supplement).** C-Tb versus TST (TST cut-point  $\geq 10$ mm for all)

29

| All, N=241                                  |       |       |        | HIV-uninfected, N=146                       |       |       |        | HIV-uninfected, N=146                       |       |       |        |    |   |    |
|---------------------------------------------|-------|-------|--------|---------------------------------------------|-------|-------|--------|---------------------------------------------|-------|-------|--------|----|---|----|
|                                             | QFT + | QFT - | QFT in |                                             | QFT + | QFT - | QFT in |                                             | QFT + | QFT - | QFT in |    |   |    |
| C-Tb+                                       | 149   | 16    | 13     | 178                                         | C-Tb+ | 91    | 12     | 9                                           | 112   | C-Tb+ | 58     | 4  | 4 | 66 |
| C-Tb-                                       | 32    | 25    | 6      | 63                                          | C-Tb- | 21    | 9      | 4                                           | 34    | C-Tb- | 11     | 16 | 2 | 29 |
|                                             | 181   | 41    | 19     | 241                                         |       | 112   | 21     | 13                                          | 146   |       | 69     | 20 | 6 | 95 |
| McNemar's test: p= 0.030<br>Agreement: 0.78 |       |       |        | McNemar's test: p= 0.164<br>Agreement: 0.75 |       |       |        | McNemar's test: p= 0.121<br>Agreement: 0.83 |       |       |        |    |   |    |

30 **TABLE S6C (Online supplement).** C-Tb versus QFT-GIT

31

|                | N   |      | Mild<br>N (%) E | Moderate<br>N (%) E | Severe<br>N (%) E | Total<br>N (%) E | p-value* |
|----------------|-----|------|-----------------|---------------------|-------------------|------------------|----------|
| All            | 253 | C-Tb | 98 (38.7) 184   | 18 (1.6) 34         | 4 (1.6) 10        | 120 (47.4) 228   | 0.0003   |
|                |     | TST  | 127 (50.2) 228  | 19 (7.5) 40         | 4 (1.6) 8         | 150 (59.3) 276   |          |
| HIV-uninfected | 153 | C-Tb | 63 (41.2) 115   | 11 (7.2) 22         | 2 (1.3) 4         | 76 (49.7) 141    | 0.0014   |
|                |     | TST  | 86 (56.2) 151   | 9 (5.9) 20          | 2 (1.3) 4         | 97 (63.4) 175    |          |
| HIV-infected   | 100 | C-Tb | 35 (35.0) 69    | 7 (7.0) 22          | 2 (2.0) 6         | 44 (44.0) 87     | 0.1096   |
|                |     | TST  | 41 (41.0) 77    | 10 (10.0) 20        | 2 (2.0) 4         | 53 (53.0) 101    |          |

N= Number of participants experiencing at least one injection site adverse reaction.  
E= total number of reported injection site adverse reactions.  
\*McNemars's test comparing total number of participants experiencing at least one event between C-Tb and TST

32 **Table S7 (Online supplement).** Injection site adverse reactions

33
